# Supplementary material
Source: PubMed Central journal article supplement (PMC3149177)

# Figure S1

**a**

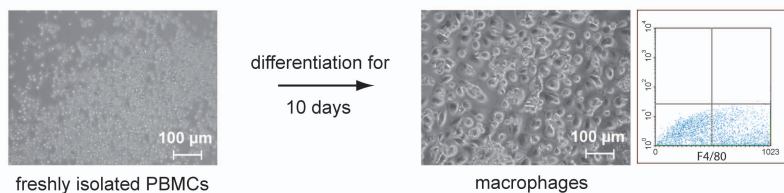

**b**

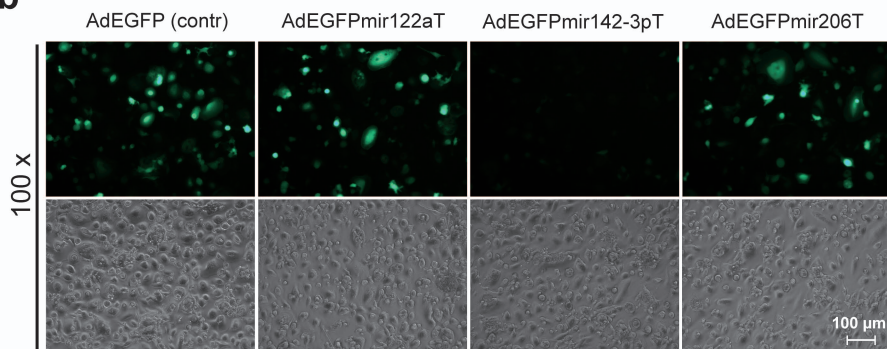

**c**

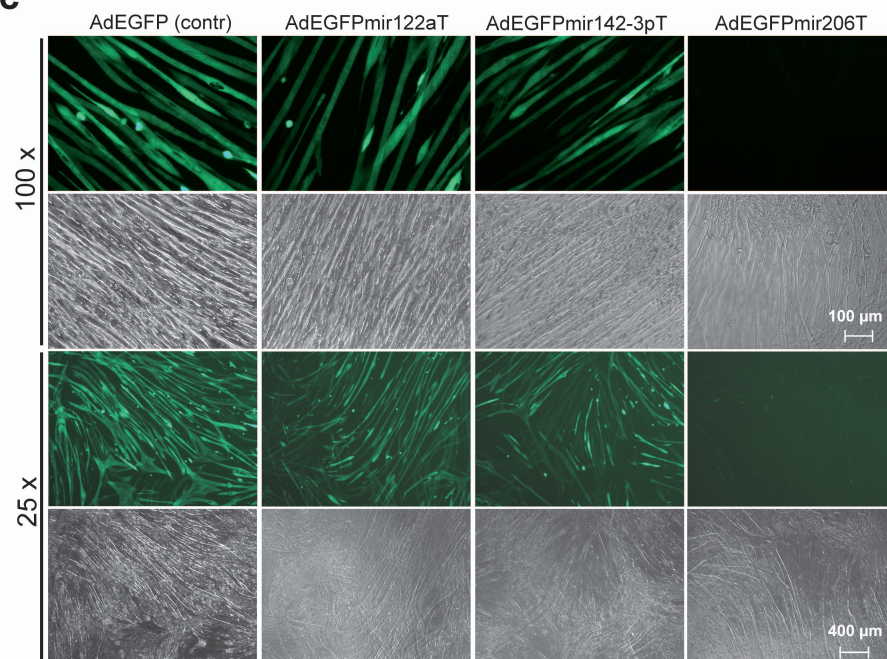

**d**

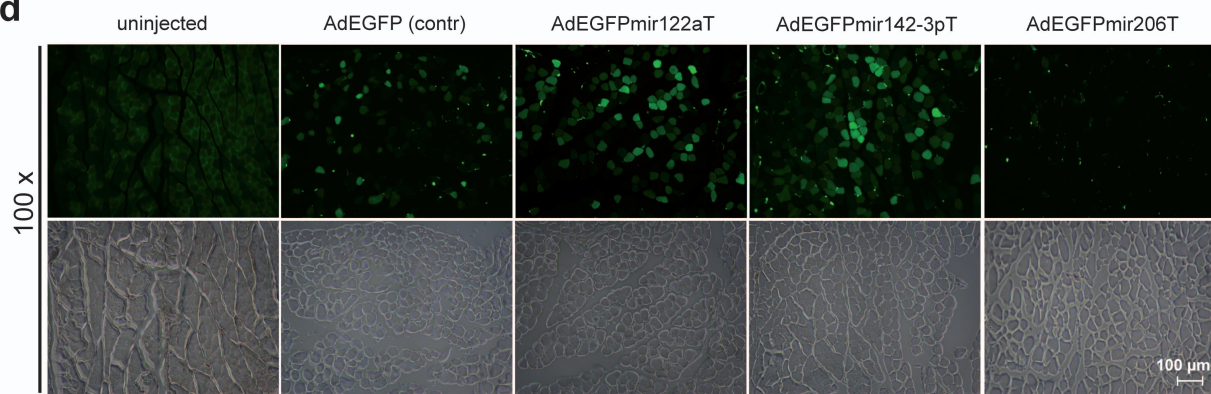

Supplement: mt201183x1.pdf [file mt201183x1.pdf]

**Figure S2**

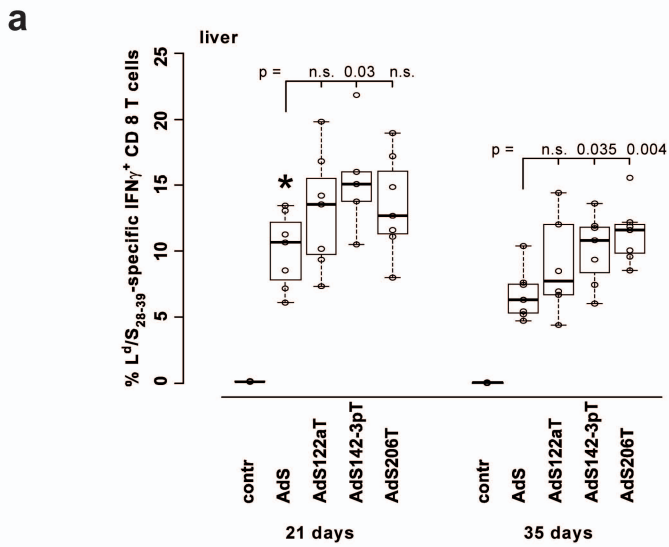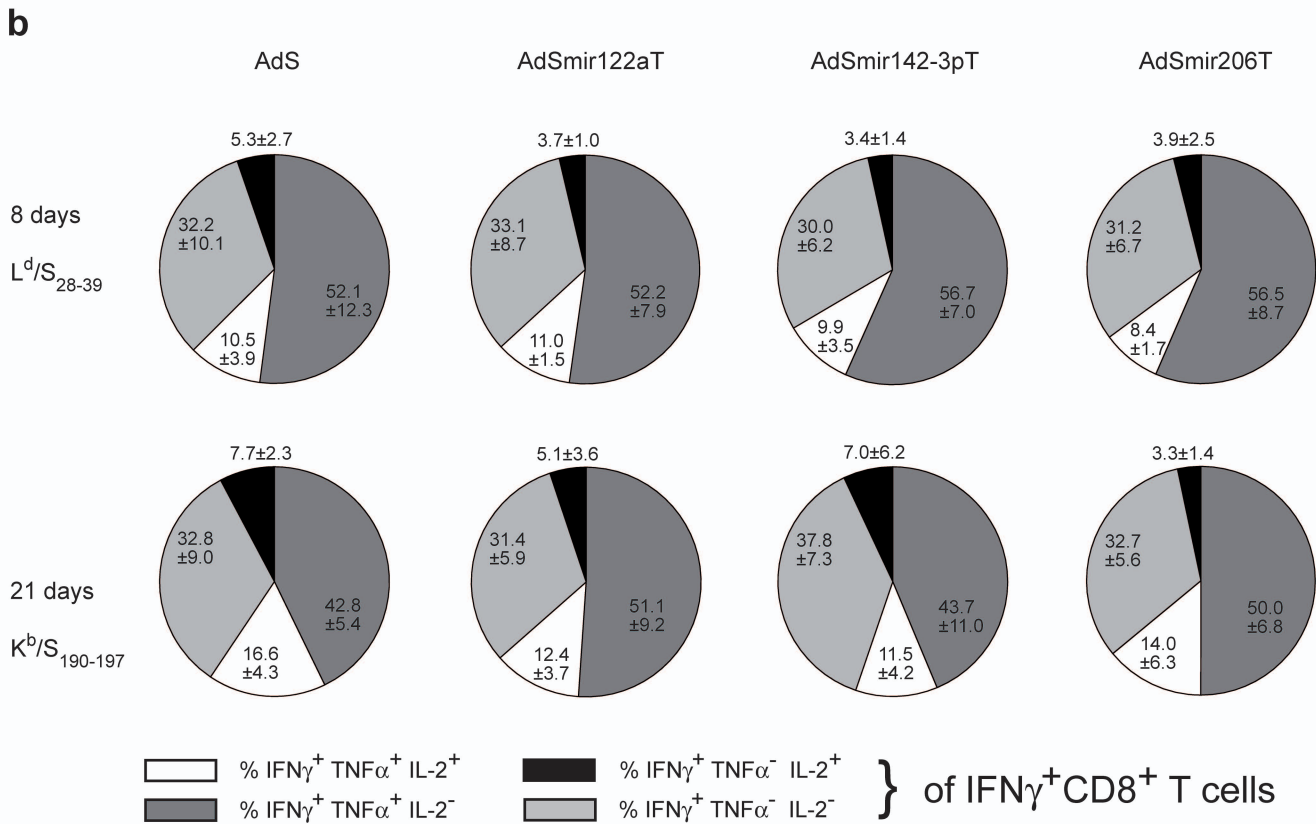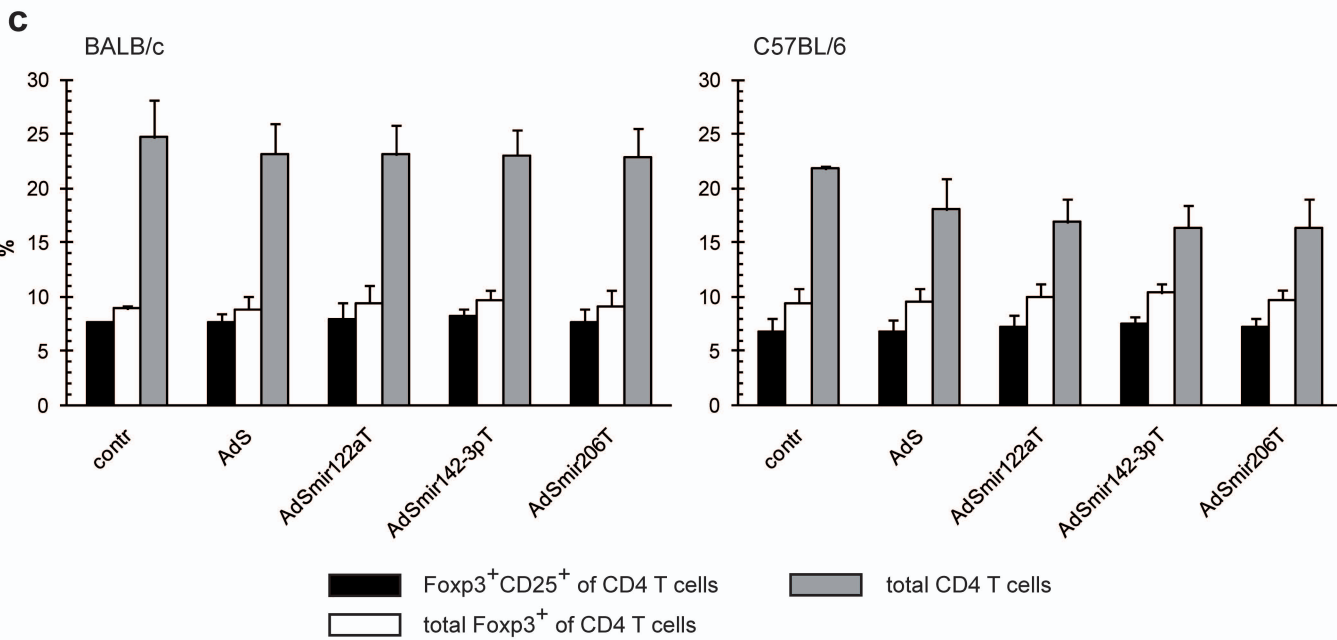

Supplement: mt201183x2.pdf [file mt201183x2.pdf]
